# Supplementary material
Source: PubMed Central journal article supplement (PMC7286360)

Huang et al. Supplementary Figure 1

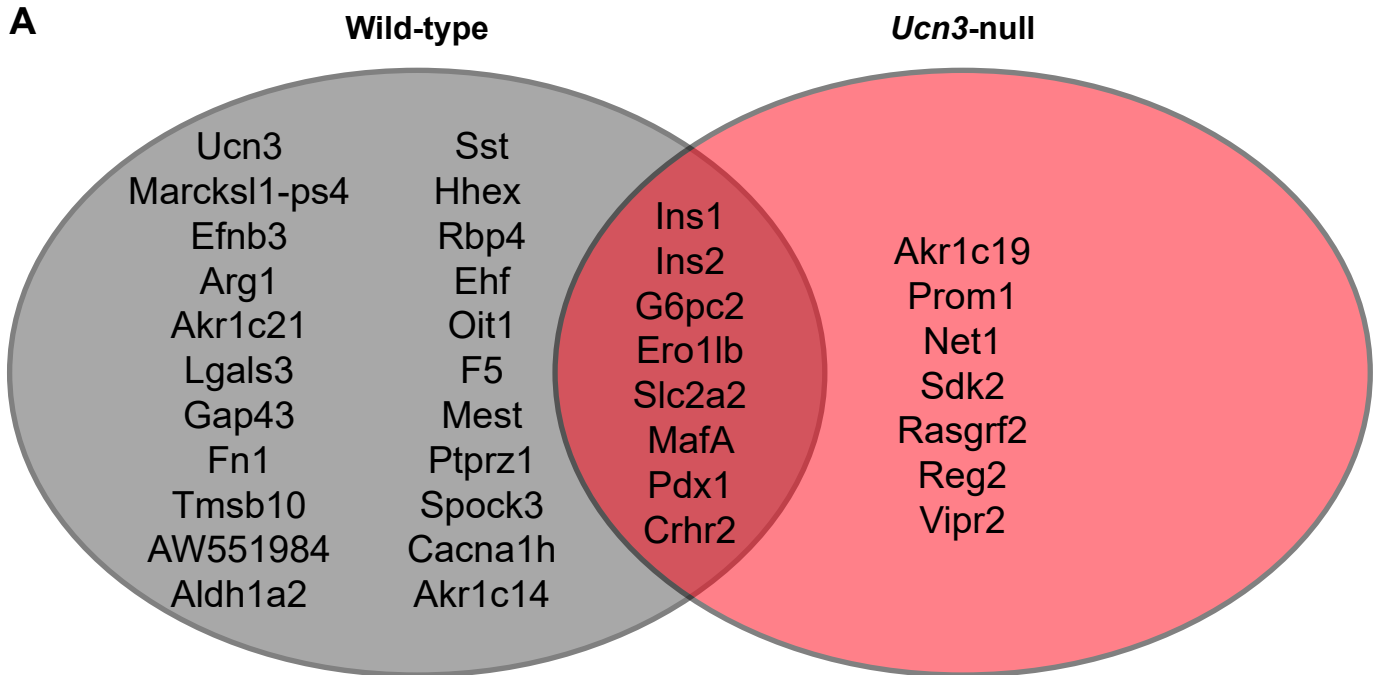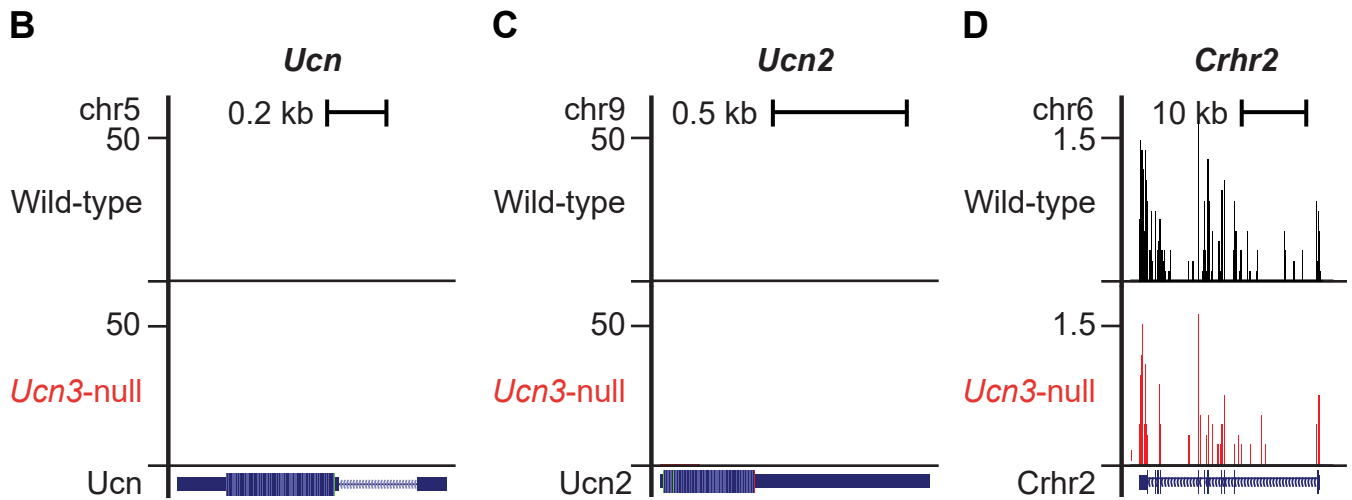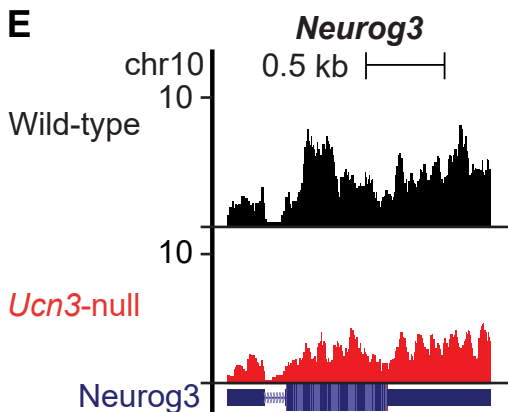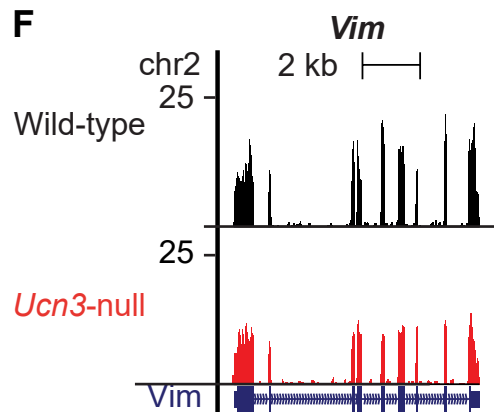

Supplement: NIHMS1592892-supplement-01.pdf [file NIHMS1592892-supplement-01.pdf]

Huang et al. Supplementary Figure 2

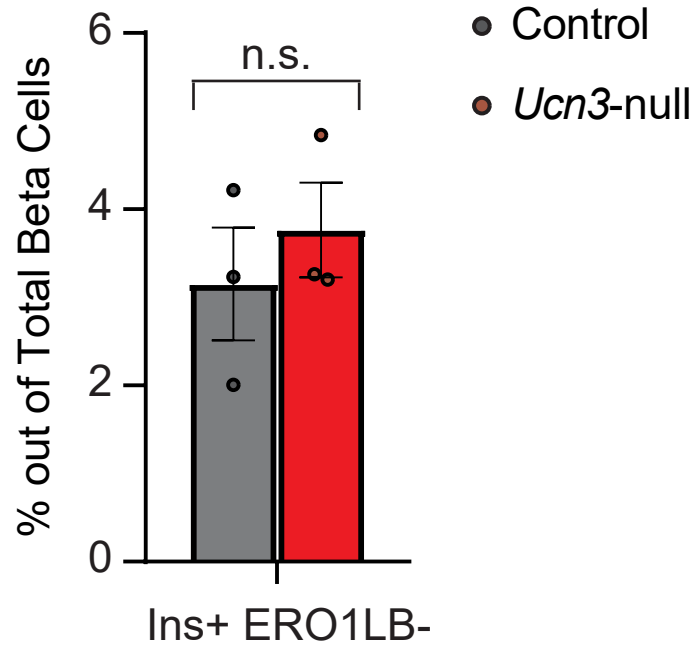

Supplement: NIHMS1592892-supplement-02.pdf [file NIHMS1592892-supplement-02.pdf]

Huang et al. Supplementary Figure 3

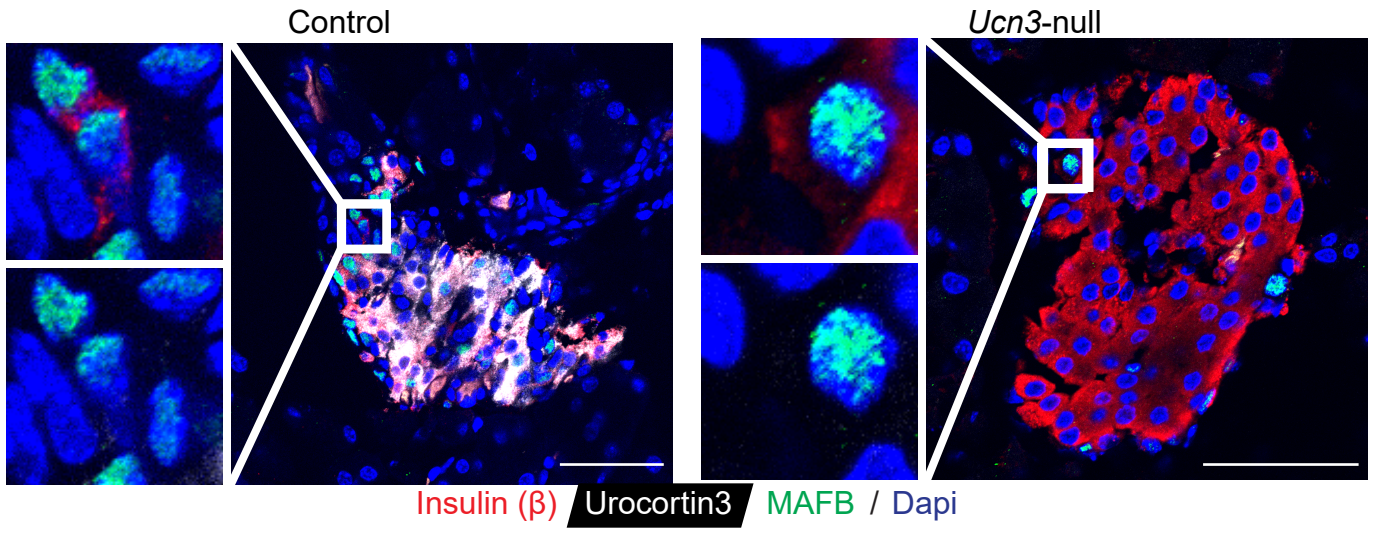

Supplement: NIHMS1592892-supplement-03.pdf [file NIHMS1592892-supplement-03.pdf]

Huang et al. Supplementary Figure 4

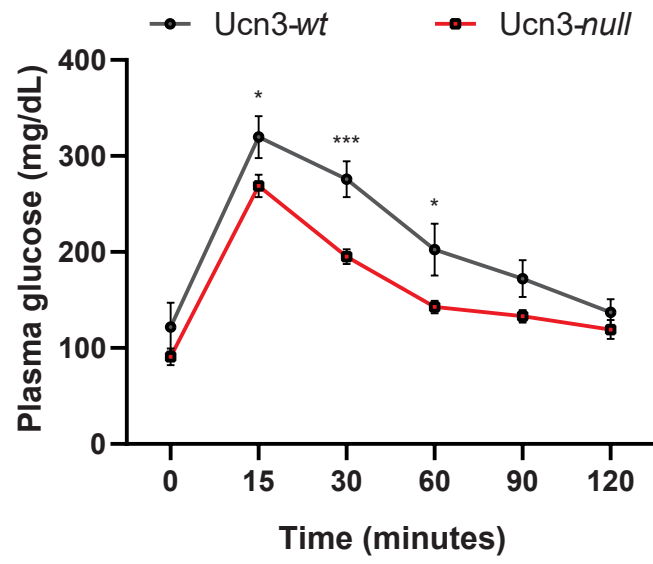

Supplement: NIHMS1592892-supplement-04.pdf [file NIHMS1592892-supplement-04.pdf]
